# Supplementary material
Source: PubMed Central journal article supplement (PMC3141918)
Supplement: 1018832108_Appendix.pdf [file 1018832108_Appendix.pdf]

# Separating Intrinsic from Extrinsic Fluctuations in Dynamic Biological Systems (Supplementary Information)

Andreas Hilfinger and Johan Paulsson  
Department of Systems Biology, Harvard University  
200 Longwood Ave, Boston, MA 02115, USA

Johan\_Paulsson@hms.harvard.edu

This supplementary material presents the proofs of the mathematical results presented in the main text.

## Example environmental state decomposition:

The discrepancy between a static decomposition (cf. Eq. 3 of the main text) and intrinsic and extrinsic noise contributions in dynamical systems is illustrated by the example reaction scheme 4 (main text). Making use of the fact that  $P(z)$  follows a Poisson distribution satisfying  $P(z+1) = P(z) \times \lambda_z / (\beta_z(z+1))$  we can derive the following recurrence relation for  $\langle x|z \rangle = \sum_x xP(x, z)/P(z)$  from the master equation

$$\lambda_x z = \beta_x \langle x|z \rangle - \beta_z z (\langle x|z-1 \rangle - \langle x|z \rangle) - \lambda_z (\langle x|z+1 \rangle - \langle x|z \rangle) \quad .$$

Substitution verifies that this equation has a simple solution of the form  $\langle x|z \rangle = A + Bz$  and we find

$$\langle x|z \rangle = \frac{\beta_x}{\beta_x + \beta_z} \left( \frac{\lambda_x \lambda_z}{\beta_x \beta_z} + \frac{\lambda_x}{\beta_x} z \right) \quad ,$$

which also satisfies the additional conditions that determine the solution to a second order recurrence relation:  $\sum_x \langle x|z \rangle P(z) = \langle x \rangle$  and  $\langle x|0 \rangle = \langle x|1 \rangle \lambda_z / (\lambda_z + \beta_x)$  (from evaluating the master equation at the  $z = 0$  edge). Averaging over the extrinsic distribution then leads to

$$\langle \langle x|\mathbf{Z} \rangle^2 \rangle \equiv \sum_z \langle x|z \rangle^2 P(z) = \langle x \rangle^2 \left( 1 + \frac{1}{\langle z \rangle} \frac{\tau_z}{\tau_x + \tau_z} \right) \quad ,$$

and the result of Eq. 6 (main text) for  $\langle \sigma_{X|Z}^2 \rangle = \langle \langle x|\mathbf{Z} \rangle^2 \rangle - \langle \langle x|\mathbf{Z} \rangle \rangle^2$  follows.

## Periodically changing environments:

Introducing conditional averages for a given environmental time trace  $\mathbf{Z}[0, t^*]$  that ends at a specific phase  $t^*$ , and then averaging over all phases  $t^*$  allows us to re-write the conditional averages in Eq. 9 (main text):  $\langle \langle X_t | \mathbf{Z}[0, t] \rangle \rangle_{\mathbf{Z}[0, t]} = \langle \langle \langle X_t | \mathbf{Z}[0, t^*] \rangle \rangle_{\mathbf{Z}[0, t^*]} \rangle_{t^*}$  where the subscripts denote the variable we average over. Using those conditional averages and making use of  $\langle \langle X_t | \mathbf{Z}[0, t^*] \rangle \rangle_{\mathbf{Z}[0, t^*]} = \langle X_t | t^* \rangle$  we can apply the law of total variance to the extrinsic noise

$$\begin{aligned} \sigma_{\text{ext}}^2 = & \underbrace{\langle \langle \langle X_t | \mathbf{Z}[0, t^*] \rangle^2 \rangle_{\mathbf{Z}[0, t^*]} - \langle \langle X_t | \mathbf{Z}[0, t^*] \rangle \rangle_{\mathbf{Z}[0, t^*]}^2 \rangle_{t^*}}_{\sigma_{\text{ext}}^2(t^*)} \\ & + \underbrace{\langle \langle \langle X_t | \mathbf{Z}[0, t^*] \rangle \rangle_{\mathbf{Z}[0, t^*]}^2 \rangle_{t^*} - \langle \langle \langle X_t | \mathbf{Z}[0, t^*] \rangle \rangle_{\mathbf{Z}[0, t^*]} \rangle_{t^*}^2}_{\sigma_{\langle X_{t^*} | t^* \rangle}^2} \quad , \end{aligned}$$

and the result of Eq. 9 (main text) follows. Because the two reporters are independent when conditioned on an environmental history  $\mathbf{Z}[0, t^*]$  we furthermore have

$$\begin{aligned}\sigma_{\text{ext}}^2(t^*) &= \langle\langle X_t Y_t | \mathbf{Z}[0, t^*] \rangle\rangle_{\mathbf{Z}[0, t^*]} - \langle\langle X_t | \mathbf{Z}[0, t^*] \rangle\rangle_{\mathbf{Z}[0, t^*]}^2 \\ &= \underbrace{\langle X_t Y_t | t^* \rangle - \langle X_t | t^* \rangle \langle Y_t | t^* \rangle}_{\text{Cov}_{\text{sync}}(x, y; t^*)} .\end{aligned}$$

## Modeling intrinsic noise – additive environments:

By considering  $\sum_{\mathbf{x}, \mathbf{y}} x^2 dP/dt$  we find that for intrinsically linear systems the time evolution of the conditional covariance matrix  $C_{ij} \equiv \langle X_{i,t} X_{j,t} | \mathbf{Z}[0, t] \rangle - \langle X_{i,t} | \mathbf{Z}[0, t] \rangle \langle X_{j,t} | \mathbf{Z}[0, t] \rangle$  follows

$$\frac{dC}{dt} = JC + (JC)^T + B ,$$

with Jacobian  $J_{ij} = \sum_k s_{ki} dr_k/dx_j$  and diffusion matrix  $B_{ij} = \sum_k r_k (\langle \mathbf{X}_t | \mathbf{Z}[0, t] \rangle, \mathbf{z}(t)) s_{ki} s_{kj}$ . For systems subject to additive environmental influences the Jacobian matrix is constant, which means that by taking time averages we obtain an equation for the covariance matrix:  $0 = J\langle C \rangle + (J\langle C \rangle)^T + \langle B \rangle$ . Replacing the fluctuating rate constants of the original system with their averages leads to a system with a constant diffusion matrix given by  $\langle B \rangle$  while leaving the Jacobian unchanged. Its covariance matrix therefore satisfies the same equation as  $C$ . Thus the intrinsic noise  $\sigma_{\text{int}}^2 \equiv \langle C_{nn} \rangle$  can indeed be modeled by replacing fluctuating rates with their averages and thereby eliminating the extrinsic variability from systems linear in intrinsic variables and subject to additive environmental noise.

## Modeling intrinsic noise – multiplicative environments:

For the system described in reaction scheme 11 (main text) the conditional average and the conditional variance follow

$$\begin{aligned}\frac{d\langle \mathbf{X}_t | \mathbf{Z}[0, t] \rangle}{dt} &= \lambda(\mathbf{z}(t)) - \beta(\mathbf{z}(t)) \langle \mathbf{X}_t | \mathbf{Z}[0, t] \rangle \\ \frac{d\sigma_{X_t | \mathbf{Z}[0, t]}^2}{dt} &= \lambda(\mathbf{z}(t)) + \beta(\mathbf{z}(t)) \langle \mathbf{X}_t | \mathbf{Z}[0, t] \rangle - 2\beta(\mathbf{z}(t)) \sigma_{X_t | \mathbf{Z}[0, t]}^2 .\end{aligned}$$

Substituting the ansatz  $f(t) = \sigma_{X_t | \mathbf{Z}[0, t]}^2 - \langle \mathbf{X}_t | \mathbf{Z}[0, t] \rangle$  we obtain  $df/dt = -2\beta(\mathbf{z}(t))f$  and therefore  $f(t) \sim \exp[-2 \int \beta(\mathbf{z}(t)) dt]$  which tends to zero as  $t \rightarrow \infty$ . Hence the time averages satisfy  $\langle \sigma_{X_t | \mathbf{Z}[0, t]}^2 \rangle = \langle \langle \mathbf{X}_t | \mathbf{Z}[0, t] \rangle \rangle$ . Replacing  $\beta(\mathbf{z})$  with the constant  $\langle \beta(\mathbf{z})x \rangle / \langle x \rangle$  and replacing  $\lambda(\mathbf{z})$  with  $\langle \lambda(\mathbf{z}) \rangle$  removes the effect of environmental variability while preserving the system average. This process thus eliminates the influence of environmental variability while leading to a system whose fluctuations model the intrinsic noise.
